# Supplementary material for: Analysis of Genetic Diversity and Population Structure of Endemic Endangered Goose (Anser cygnoides) Breeds Based on Mitochondrial CYTB
Source: MDPI journal article supplement (doi:10.3390/ani14101480), 2024-05-16
Supplement: s1 [file s1]

**Table S2. Distribution data of haplotypes of six endangered goose breeds:**

|         |    |                                                                                                                                                                                      |
|---------|----|--------------------------------------------------------------------------------------------------------------------------------------------------------------------------------------|
| Hap_1:  | 4  | [YJ30-Yanjan YJ24-Yanjan YJ18-Yanjan WZ23-wuzong]                                                                                                                                    |
| Hap_2:  | 1  | [YJ29-Yanjan]                                                                                                                                                                        |
| Hap_3:  | 5  | [YJ28-Yanjan YJ23-Yanjan YJ15-Yanjan YJ7-Yanjan WZ30-wuzong]                                                                                                                         |
| Hap_4:  | 12 | [YJ27-Yanjan YJ21-Yanjan YJ20-Yanjan YJ19-Yanjan YE28-Yan YE26-Yan YE20-Yan XP17-xupu WZ28-wuzong WZ27-wuzong LX28-linxiang LX20-linxiang]                                           |
| Hap_5:  | 1  | [YJ26-Yanjan]                                                                                                                                                                        |
| Hap_6:  | 4  | [YJ25-Yanjan YJ22-Yanjan XP30-xupu XP27-xupu]                                                                                                                                        |
| Hap_7:  | 1  | [YJ17-Yanjan]                                                                                                                                                                        |
| Hap_8:  | 1  | [YJ16-Yanjan]                                                                                                                                                                        |
| Hap_9:  | 7  | [YJ13-Yanjan YJ10-Yanjan YJ3-Yanjan YE7-Yan YE1-Yan BZ15-baizi BZ14-baizi]                                                                                                           |
| Hap_10: | 16 | [YJ12-Yanjan YJ11-Yanjan YJ6-Yanjan YE14-Yan XP29-xupu XP7-xupu WZ12-wuzong WZ9-wuzong WZ8-wuzong WZ4-wuzong WZ2-wuzong LX15-linxiang LX10-linxiang BZ11-baizi BZ10-baizi BZ7-baizi] |
| Hap_11: | 2  | [YJ9-Yanjan LX4-linxiang]                                                                                                                                                            |
| Hap_12: | 2  | [YJ8-Yanjan YJ5-Yanjan]                                                                                                                                                              |
| Hap_13: | 9  | [YJ4-Yanjan YE15-Yan WZ20-wuzong LX30-linxiang BZ27-baizi BZ19-baizi BZ12-baizi BZ9-baizi BZ4-baizi]                                                                                 |
| Hap_14: | 9  | [YJ2-Yanjan YE8-Yan XP2-xupu WZ11-wuzong WZ6-wuzong WZ3-wuzong WZ1-wuzong LX8-linxiang LX2-linxiang]                                                                                 |
| Hap_15: | 1  | [YJ1-Yanjan]                                                                                                                                                                         |
| Hap_16: | 5  | [YE30-Yan XP13-xupu XP5-xupu LX16-linxiang BZ23-baizi]                                                                                                                               |
| Hap_17: | 1  | [YE29-Yan]                                                                                                                                                                           |
| Hap_18: | 1  | [YE27-Yan]                                                                                                                                                                           |
| Hap_19: | 3  | [YE25-Yan XP24-xupu BZ24-baizi]                                                                                                                                                      |
| Hap_20: | 1  | [YE24-Yan]                                                                                                                                                                           |
| Hap_21: | 1  | [YE23-Yan]                                                                                                                                                                           |
| Hap_22: | 1  | [YE22-Yan]                                                                                                                                                                           |
| Hap_23: | 2  | [YE21-Yan LX17-linxiang]                                                                                                                                                             |
| Hap_24: | 1  | [YE19-Yan]                                                                                                                                                                           |
| Hap_25: | 3  | [YE18-Yan XP25-xupu XP23-xupu]                                                                                                                                                       |
| Hap_26: | 2  | [YE17-Yan LX21-linxiang]                                                                                                                                                             |
| Hap_27: | 1  | [YE16-Yan]                                                                                                                                                                           |
| Hap_28: | 3  | [YE13-Yan LX12-linxiang BZ26-baizi]                                                                                                                                                  |
| Hap_29: | 3  | [YE12-Yan LX14-linxiang LX13-linxiang]                                                                                                                                               |
| Hap_30: | 3  | [YE11-Yan XP12-xupu XP8-xupu]                                                                                                                                                        |
| Hap_31: | 1  | [YE10-Yan]                                                                                                                                                                           |
| Hap_32: | 1  | [YE9-Yan]                                                                                                                                                                            |
| Hap_33: | 3  | [YE6-Yan YE2-Yan XP4-xupu]                                                                                                                                                           |
| Hap_34: | 2  | [YE5-Yan XP3-xupu]                                                                                                                                                                   |
| Hap_35: | 2  | [YE4-Yan LX6-linxiang]                                                                                                                                                               |
| Hap_36: | 1  | [YE3-Yan]                                                                                                                                                                            |
| Hap_37: | 1  | [XP28-xupu]                                                                                                                                                                          |

Hap\_38: 1 [XP26-xupu]  
Hap\_39: 1 [XP22-xupu]  
Hap\_40: 2 [XP21-xupu XP20-xupu]  
Hap\_41: 1 [XP19-xupu]  
Hap\_42: 1 [XP18-xupu]  
Hap\_43: 1 [XP15-xupu]  
Hap\_44: 1 [XP14-xupu]  
Hap\_45: 1 [XP11-xupu]  
Hap\_46: 3 [XP10-xupu WZ13-wuzong BZ18-baizi]  
Hap\_47: 1 [XP9-xupu]  
Hap\_48: 5 [XP6-xupu BZ8-baizi BZ3-baizi BZ2-baizi BZ1-baizi]  
Hap\_49: 1 [XP1-xupu]  
Hap\_50: 1 [WZ29-wuzong]  
Hap\_51: 2 [WZ26-wuzong WZ19-wuzong]  
Hap\_52: 1 [WZ25-wuzong]  
Hap\_53: 1 [WZ24-wuzong]  
Hap\_54: 1 [WZ22-wuzong]  
Hap\_55: 1 [WZ21-wuzong]  
Hap\_56: 1 [WZ18-wuzong]  
Hap\_57: 1 [WZ17-wuzong]  
Hap\_58: 1 [WZ16-wuzong]  
Hap\_59: 1 [WZ14-wuzong]  
Hap\_60: 4 [WZ10-wuzong LX11-linxiang BZ22-baizi BZ13-baizi]  
Hap\_61: 1 [WZ7-wuzong]  
Hap\_62: 1 [WZ5-wuzong]  
Hap\_63: 1 [LX29-linxiang]  
Hap\_64: 1 [LX27-linxiang]  
Hap\_65: 2 [LX26-linxiang LX25-linxiang]  
Hap\_66: 1 [LX24-linxiang]  
Hap\_67: 1 [LX23-linxiang]  
Hap\_68: 1 [LX22-linxiang]  
Hap\_69: 1 [LX19-linxiang]  
Hap\_70: 1 [LX18-linxiang]  
Hap\_71: 1 [LX9-linxiang]  
Hap\_72: 3 [LX7-linxiang LX5-linxiang BZ6-baizi]  
Hap\_73: 3 [LX3-linxiang LX1-linxiang BZ30-baizi]  
Hap\_74: 1 [BZ29-baizi]  
Hap\_75: 1 [BZ28-baizi]  
Hap\_76: 1 [BZ25-baizi]  
Hap\_77: 1 [BZ21-baizi]  
Hap\_78: 1 [BZ20-baizi]  
Hap\_79: 1 [BZ17-baizi]  
Hap\_80: 1 [BZ16-baizi]  
Hap\_81: 1 [BZ5-baizi]
